# Supplementary material for: Reduced cellularity of bone marrow in multiple sclerosis with decreased MSC expansion potential and premature ageing in vitro
Source: PubMed Central journal article supplement (PMC6029147; doi:10.1177/1352458517711276), 2017-05-26
Supplement: MSJ711276_supplementary_tables.pdf [file MSJ711276_supplementary_tables.pdf]

## SUPPLEMENTARY INFORMATION

**Table 1** Summary data for both control and MS cohorts including information regarding which samples were included for each of the analyses undertaken

| Subject             | Sex | Age          | Classification MS | Duration of progression of MS (years) | Exposure to disease modifying therapy | Experiments including analysis of samples            |
|---------------------|-----|--------------|-------------------|---------------------------------------|---------------------------------------|------------------------------------------------------|
| Control 1           | M   | 54           | N/A               | N/A                                   | N/A                                   | Phenotype, PDT,CFU,B-GAL                             |
| Control 2           | F   | 65           | N/A               | N/A                                   | N/A                                   | Phenotype, PDT,CFU,B-GAL                             |
| Control 3           | M   | 70           | N/A               | N/A                                   | N/A                                   | Phenotype, PDT,CFU,B-GAL                             |
| Control 4           | F   | 60           | N/A               | N/A                                   | N/A                                   | Phenotype, PDT,CFU,B-GAL + Telomere length           |
| Control 5           | M   | 49           | N/A               | N/A                                   | N/A                                   | Phenotype, PDT,CFU,B-GAL + Telomere length           |
| Control 6           | M   | 66           | N/A               | N/A                                   | N/A                                   | Phenotype, PDT,CFU,B-GAL                             |
| Control 7           | F   | 68           | N/A               | N/A                                   | N/A                                   | Phenotype, PDT,CFU,B-GAL                             |
| Control 8           | M   | 58           | N/A               | N/A                                   | N/A                                   | Phenotype, PDT,CFU,B-GAL + Telomere length           |
| Control 9           | M   | 55           | N/A               | N/A                                   | N/A                                   | Telomere length                                      |
| Control 10          | M   | 59           | N/A               | N/A                                   | N/A                                   | Telomere length                                      |
| Control 11          | F   | 53           | N/A               | N/A                                   | N/A                                   | Telomere length                                      |
| <b>Mean (yrs)</b>   |     | <b>59.73</b> |                   |                                       |                                       |                                                      |
| <b>Median (yrs)</b> |     | <b>59</b>    |                   |                                       |                                       |                                                      |
|                     |     |              |                   |                                       |                                       |                                                      |
| MS 1                | M   | 48           | PP                | 4                                     | None                                  | Phenotype, PDT,CFU,B-GAL + Telomere length + Trepine |
| MS 2                | F   | 48           | PP                | 15                                    | None                                  | Phenotype, PDT,CFU,B-GAL                             |
| MS 3                | M   | 60           | SP                | 10                                    | None                                  | Phenotype, PDT,CFU,B-GAL + Telomere length           |
| MS 4                | M   | 33           | SP                | 3                                     | Beta-interferon                       | Phenotype, PDT,CFU,B-GAL + Trepine                   |
| MS 5                | F   | 47           | PP                | 9                                     | None                                  | Phenotype, PDT,CFU,B-GAL + Telomere length + Trepine |
| MS 6                | F   | 47           | PP                | 6                                     | None                                  | Phenotype, PDT,CFU,B-GAL +Trepine                    |
| MS 7                | F   | 59           | SP                | 15                                    | None                                  | Phenotype, PDT,CFU,B-GAL + Telomere length + Trepine |
| MS 8                | M   | 55           | SP                | 2                                     | None                                  | Phenotype, PDT,CFU,B-GAL + Telomere length + Trepine |
| MS 9                | M   | 56           | SP                | 15                                    | None                                  | Phenotype, PDT,CFU,B-GAL + Telomere length + Trepine |
| MS 10               | F   | 53           | SP                | 3                                     | None                                  | Phenotype, PDT,CFU,B-GAL + Telomere length + Trepine |
| MS 11               | M   | 49           | PP                | 14                                    | None                                  | Phenotype, PDT,CFU,B-GAL + Telomere length + Trepine |
| MS 12               | M   | 64           | PP                | 15                                    | None                                  | Phenotype, PDT,CFU,B-GAL + Telomere length + Trepine |
| MS 13               | M   | 50           | PP                | 2                                     | None                                  | Telomere length + Trepine                            |
| MS 14               | F   | 52           | PP                | 15                                    | None                                  | Trepine                                              |
| MS 15               | F   | 40           | SP                | 8                                     | None                                  | Trepine                                              |
| MS 16               | M   | 50           | SP                | 2                                     | None                                  | Trepine                                              |
| MS 17               | M   | 63           | SP                | 12                                    | Beta-interferon                       | Trepine                                              |

|                     |   |              |    |             |                                                  |                          |
|---------------------|---|--------------|----|-------------|--------------------------------------------------|--------------------------|
| MS 18               | M | 55           | SP | 5           | None                                             | Trephine                 |
| MS 19               | F | 41           | SP | 2           | Glatiramer                                       | Trephine                 |
| MS 20               | F | 50           | PP | 4           | None                                             | Trephine                 |
| MS 21               | F | 49           | SP | 4           | Beta-interferon                                  | Trephine                 |
| MS 22               | F | 58           | PP | 10          | None                                             | Trephine                 |
| MS 23               | F | 57           | SP | 3           | Glatiramer                                       | Trephine                 |
| MS 24               | F | 62           | SP | 8           | Beta-interferon                                  | Trephine                 |
| MS 25               | F | 54           | SP | 2           | Copaxone,<br>beta-<br>interferon,<br>alemtuzumab | Trephine                 |
| MS 26               | M | 48           | SP | 9           | None                                             | Phenotype, PDT,CFU,B-GAL |
| MS 27               | M | 57           | SP | 11          | None                                             | Phenotype, PDT,CFU,B-GAL |
| MS 28               | F | 47           | SP | 14          | Glatiramer,<br>beta-interferon                   | Phenotype, PDT,CFU,B-GAL |
|                     |   |              |    |             |                                                  |                          |
| <b>Mean (yrs)</b>   |   | <b>51.86</b> |    | <b>7.93</b> |                                                  |                          |
| <b>Median (yrs)</b> |   | <b>51</b>    |    | <b>8</b>    |                                                  |                          |

**Table 2** Source and dilution of antibodies for immunohistochemistry of bone marrow trephines and MSC immunocytochemistry

| <b>Antibody</b>           | <b>Dilution</b> | <b>Manufacturer</b> |
|---------------------------|-----------------|---------------------|
| CD3                       | 1:100           | Leica               |
| CD20                      | 1:300           | Leica               |
| CD138                     | 1:100           | Dako                |
| Vimentin                  | 1:800           | Dako                |
| CD34                      | 1:1500          | Leica               |
| P53                       | 1:300           | Leica               |
| P16                       | Pre-dilute      | Roche (CINtec)      |
| CD56 (NCAM)               | 1:200           | Leica               |
| CD117                     | 1:500           | Dako                |
| CD61                      | 1:200           | Leica               |
| Myeloperoxidase           | Pre-dilute      | Leica               |
| Glycophorin A<br>(CD235a) | 1:400           | Dako                |
| Ki67                      | Pre-dilute      | Leica               |
| CD73                      | 1:200           | Abcam               |
| CD105                     | 1:200           | Abcam               |
| CD271                     | 1:200           | Millipore           |
| STRO1                     | 1:200           | Millipore           |
| Fibronectin               | 1:400           | Sigma               |
| $\beta$ III tubulin       | 1:400           | Sigma               |

## Reporting criteria for bone marrow trephines

Samples were reported according to standard clinical methodology including an assessment of myeloid:erythroid ratio (M:E), fibrosis and bone structure. To allow for age-related changes in cellularity,<sup>1, 2</sup> the following were considered normal: <40 years old, 60% cellularity; 40-50 years old, 50% cellularity; 50-60 years old, 40% cellularity; 60-70 years old, 30% cellularity. Immunohistochemistry staining was evaluated on 2 occasions by the same pathologist blinded as to their original assessment.

Proliferation was assessed using immunohistochemistry for the nuclear marker Ki67 across all cell types (myeloid precursors, erythroid cells and megakaryocytes) and <60% total cells positive for Ki67 was considered abnormal.<sup>3</sup>

Expression of p16 (cyclin-dependent kinase inhibitor 2A, multiple tumor suppressor 1) staining was analysed semiquantitatively; + representing 1-4 positive cells, ++ 5-10 positive cells and +++ 11-15 positive cells per high power field (x40 magnification).

1. Bain BJ. The bone marrow aspirate of healthy subjects. *Br J Haematol.* 1996; 94: 206-9.
2. Orazi A, O'Malley D and Arber D. Illustrated Pathology of the Bone Marrow. Cambridge University Press, 2006.
3. Pellegrini W, Facchetti F, Marocolo D, et al. Assessment of cell proliferation in normal and pathological bone marrow biopsies: a study using double sequential immunophenotyping on paraffin sections. *Histopathology.* 1995; 27: 397-405.
